# Supplementary material
Source: PubMed Central journal article supplement (PMC3703662)
Supplement: NIHMS304764-supplement-4.pdf [file NIHMS304764-supplement-4.pdf]

## **Legends for Supplementary figures**

### Supplementary Figure 1

Chemical structures of Rapamycin and NV-128

### Supplementary Figure 2

NV-128 is a potent monotherapy for the OCSCs. OCSCs were pre-treated with 10µg/ml NV-128 for 4h, washed, then further treated with 100 µg/ml carboplatin or 2 µM paclitaxel for 20h. Note that the addition of carboplatin or paclitaxel does not have an additive nor synergistic effect. \*  $p = 0.0001$  compared to control, #  $p = 0.39$  compared to NV-128 alone.

### Supplementary Figure 3

Densitometer readings of replicate western blot gels. For each protein measured, protein levels in treated cultures (10 µg/ml NV-128 for 4h) were compared to control and presented as fold-change from control. Data presented are mean obtained from at least three independent experiment. \*  $p = 0.001$ , \*\*  $p < 0.0001$ , \*\*\*  $p = 0.003$ .
